# Supplementary material for: Home Range and Activity Patterns of Free-Ranging Cats: A Case Study from a Chinese University Campus
Source: MDPI journal article supplement (doi:10.3390/ani12091141), 2022-04-28
Supplement: s1 [file s1]

Table S1. Sex, Captured time of cats used to determine home range on the Nanjing University Xianlin campus (2018--2020).

| Cat name | Sex    | Date          | Season       | 100%MCP (ha) | 95%KDE (ha) | 50%KDE (ha) |
|----------|--------|---------------|--------------|--------------|-------------|-------------|
| FM1      | Female | October 2018  | Non-Breeding | 9.35         | 10.19       | 1.60        |
| FM2      | Female | October 2018  | Non-Breeding | 9.42         | 10.14       | 1.34        |
| FM4      | Female | October 2018  | Non-Breeding | 16.93        | 18.78       | 4.70        |
| FM5      | Female | November 2018 | Non-Breeding | 5.52         | 5.06        | 0.85        |
| FM6      | Female | November 2018 | Non-Breeding | 1.35         | 1.63        | 0.26        |
| I-5F     | Female | December 2019 | Non-Breeding | 1.23         | 0.56        | 0.08        |
| FMA      | Female | May 2019      | Breeding     | 7.60         | 12.21       | 2.51        |
| FMB      | Female | May 2019      | Breeding     | 6.87         | 6.07        | 0.84        |
| FMC      | Female | May 2019      | Breeding     | 8.56         | 8.87        | 1.18        |
| FMD      | Female | May 2019      | Breeding     | 2.57         | 3.22        | 0.73        |
| FME      | Female | May 2019      | Breeding     | 1.96         | 2.21        | 0.25        |
| III-2F   | Female | June 2020     | Breeding     | 2.95         | 2.94        | 0.46        |
| III-3F   | Female | June 2020     | Breeding     | 2.47         | 3.42        | 0.55        |
| III-4F   | Female | June 2020     | Breeding     | 1.48         | 1.22        | 0.21        |
| I-2M     | Male   | December 2019 | Non-Breeding | 5.15         | 2.16        | 0.19        |
| II-10M   | Male   | December 2019 | Non-Breeding | 8.78         | 7.46        | 1.00        |
| II-11M   | Male   | December 2019 | Non-Breeding | 7.15         | 4.25        | 0.31        |
| II-12M   | Male   | December 2019 | Non-Breeding | 5.01         | 4.79        | 0.79        |
| M3       | Male   | November 2018 | Non-Breeding | 5.44         | 6.40        | 1.28        |
| M4       | Male   | November 2018 | Non-Breeding | 13.00        | 12.37       | 2.04        |
| M5       | Male   | November 2018 | Non-Breeding | 5.28         | 6.29        | 1.07        |
| M6       | Male   | November 2018 | Non-Breeding | 9.85         | 12.60       | 2.79        |
| M7       | Male   | November 2018 | Non-Breeding | 2.95         | 3.77        | 0.88        |
| MA       | Male   | May 2019      | Breeding     | 15.29        | 18.24       | 5.05        |
| MB       | Male   | May 2019      | Breeding     | 14.71        | 16.12       | 2.53        |
| MC       | Male   | May 2019      | Breeding     | 3.30         | 4.63        | 1.04        |
| MD       | Male   | May 2019      | Breeding     | 4.30         | 6.30        | 1.39        |
| ME       | Male   | May 2019      | Breeding     | 12.95        | 19.83       | 5.16        |
| III-1M   | Male   | June 2020     | Breeding     | 5.68         | 10.49       | 2.29        |
